# Supplementary material for: Program Report: KidneyPRO, a Web-based Training Module for Patient Engagement in Kidney Research
Source: PubMed Central journal article supplement — Can J Kidney Health Dis. 2020 Dec 21;7:2054358120979255. doi: 10.1177/2054358120979255 (PMC7755936; doi:10.1177/2054358120979255), 2020-12-21
Supplement: sj-pdf-1-cjk-10.1177_2054358120979255.pdf [file sj-pdf-1-cjk-10.1177_2054358120979255.pdf]

## SUPPLEMENTARY MATERIAL 1: Online Tools & Patient Partnership in Research Search Report

### 1.1. Medline [Ovid] <1946 to September 28, 2020>

| #  | Searches                                                                                                                                                                                                                                            | Results |
|----|-----------------------------------------------------------------------------------------------------------------------------------------------------------------------------------------------------------------------------------------------------|---------|
| 1  | Internet/                                                                                                                                                                                                                                           | 73441   |
| 2  | computers/                                                                                                                                                                                                                                          | 50737   |
| 3  | online systems/                                                                                                                                                                                                                                     | 8347    |
| 4  | user-computer interface/                                                                                                                                                                                                                            | 37383   |
| 5  | Internet-Based Intervention/                                                                                                                                                                                                                        | 223     |
| 6  | Education, Distance/                                                                                                                                                                                                                                | 4169    |
| 7  | ((online or on-line or web or web-based or technology-based* or internet* or virtual or digital or electronic or e-learn* or elearn* or e-health* or ehealth*) adj2 (tool* or module* or platform* or intervention#)).tw,kf.                        | 19329   |
| 8  | (e-tool* or etool*).tw,kf.                                                                                                                                                                                                                          | 69      |
| 9  | (website* or web-site*).ti,kf.                                                                                                                                                                                                                      | 3954    |
| 10 | (website* or web-site*).ab. /freq=3                                                                                                                                                                                                                 | 3788    |
| 11 | or/1-10 <a href="#">[online concept]</a>                                                                                                                                                                                                            | 177138  |
| 12 | consumer health education/                                                                                                                                                                                                                          | 0       |
| 13 | patient education as topic/                                                                                                                                                                                                                         | 85532   |
| 14 | patient participation/                                                                                                                                                                                                                              | 26118   |
| 15 | community participation/                                                                                                                                                                                                                            | 17294   |
| 16 | information dissemination/                                                                                                                                                                                                                          | 16968   |
| 17 | health communication/                                                                                                                                                                                                                               | 2442    |
| 18 | ((patient* or consumer* or famil* or caregiver* or care-giver* or carer*) adj2 (guid* or involv* or engag* or educat* or participat* or empower* or activat* or collaborat* or partner*)).tw,kf.                                                    | 157922  |
| 19 | (participant* adj2 (guid* or involv* or engag* or educat* or participat* or empower* or activat* or collaborat* or partner*)).tw,kf.                                                                                                                | 15875   |
| 20 | ((healthcare or health-care or health) adj2 user* adj2 (guid* or involv* or engag* or educat* or participat* or empower* or activat* or collaborat* or partner*)).tw,kf.                                                                            | 114     |
| 21 | or/12-20 <a href="#">[patient partnership concept]</a>                                                                                                                                                                                              | 294021  |
| 22 | and/11,21                                                                                                                                                                                                                                           | 11869   |
| 23 | (develop* or design* or codesign* or co-design* or redesign* or re-design* or codevelop* or codevelop* or framework* or frame-work* or creation or creating or create* or co-creat* or cocreat* or elaborat* or co-elaborat* or coelaborat*).ti,kf. | 922301  |
| 24 | exp kidney diseases/                                                                                                                                                                                                                                | 515239  |
| 25 | (renal* or kidney* or CKD).tw,kf.                                                                                                                                                                                                                   | 893746  |
| 26 | or/24-25                                                                                                                                                                                                                                            | 1060661 |
| 27 | or/23,26 <a href="#">[design OR kidney concepts]</a>                                                                                                                                                                                                | 1963367 |

|    |                                                                                                                                                                                                                                                                            |         |
|----|----------------------------------------------------------------------------------------------------------------------------------------------------------------------------------------------------------------------------------------------------------------------------|---------|
| 28 | and/22,27                                                                                                                                                                                                                                                                  | 1093    |
| 29 | (exp child/ or exp infant/ or adolescent/) not exp adult/                                                                                                                                                                                                                  | 1888408 |
| 30 | (newborn* or new-born* or neonat* or neo-nat* or infan* or child* or adolesc* or paediatr* or pediater* or baby* or babies* or toddler* or kid or kids or boy* or girl* or juvenile* or teen* or youth* or pubescen* or preadolesc* or prepubesc* or preteen or tween).ti. | 1511482 |
| 31 | (pediatr* or paediatr*).jw.                                                                                                                                                                                                                                                | 576110  |
| 32 | or/29-31                                                                                                                                                                                                                                                                   | 2473946 |
| 33 | 28 not 32                                                                                                                                                                                                                                                                  | 997     |
| 34 | limit 33 to (english or french)                                                                                                                                                                                                                                            | 974     |
| 35 | limit 34 to last 5 years                                                                                                                                                                                                                                                   | 431     |
| 36 | 65 articles selected from results*                                                                                                                                                                                                                                         | 65      |

**\*Note:** one additional relevant article not indexed in Medline was found during preliminary canvassing and has been included in the Endnote library sent.

None of the references included e-educational resources for patient engagement in kidney research.
